# Supplementary material for: A meta-analysis of the effects of global environmental change on plant-herbivore interactions
Source: Springer Nature journal article supplement (doi:10.1007/s11829-010-9102-7), 2010-08-09
Supplement: 11829_2010_9102_MOESM1_ESM.pdf [file 11829_2010_9102_MOESM1_ESM.pdf]

A meta-analysis of the effects of global environmental change on plant-herbivore interactions

Arthropod-Plant Interactions

Tara Joy Massad<sup>1</sup>, Lee A. Dyer

<sup>1</sup>Max Planck Institute of Biogeochemistry; tmassad@bgc-jena.mpg.de

CITATION AUTHOR

---

- 1 Abrahamson WG, Anderson SS, McCrea KD
- 2 Agrell J, Kopper B, McDonald EP, Lindroth RL
- 3 Agrell J, McDonald EP, Lindroth RL
- 4 Andrew NR, Hughes L
- 5 Angulo-Sandoval P, Aide TM
- 6 Asshoff R, Hattenschwiler S
- 7 Auslander M, Nevob E, Inbara M
- 8 Barbehenn RV, Karowe DN, Chen Z
- 9 Barbehenn RV, Karowe DN, Spickard A
- 10 Bazin A, Goverde M, Erhardt A, Shykoff JA
- 11 Benitez-Malvido J
- 12 Benitez-Malvido J, Lemus-Albor A
- 13 Benitez-Malvido J, Martinez-Ramos M, Camargo JLC, Ferraz IDK
- 14 Bentz J
- 15 Boege K
- 16 Boege K, Dirzo R
- 17 Borowicz VA, Albrecht U, Mayer RT
- 18 Boutaleb Joutei A, Roy J, Van Impe G, Lebrun P
- 19 Briggs MA
- 20 Bryant JP, Reichardt PB, Clausen TP, Werner, RA
- 21 Bultman TL, Conard NJ
- 22 Buse A, Good JEG, Dury S, Perrins CM
- 23 Campo J, Dirzo R
- 24 Chen F, Ge F, Parajulee MN
- 25 Chong J-H, van Iersel MW, Oetting RD
- 26 Cipollini DF, Bergelson J
- 27 Cisneros JJ, Godfrey LD
- 28 Cornelissen TA, Stiling P, Drake B
- 29 Coviella CE, Stipanovic RD, Trumble JT
- 30 Crone EE, Jones CG
- 31 Davies Jr. FT, He C, Chau A, Heinz KM, Cartmill AD
- 32 De Bruyn L, Scheirs J, Verhagen R
- 33 Dudt JF, Shure DJ
- 34 Facknath S, Lalljee B
- 35 Farji-Brener AG
- 36 Forkner RE, Hunter MD
- 37 Forkner RE, Marquis RJ, Lill JT
- 38 Fortin M, Mauffette Y
- 39 Fraser LH, Grime JP
- 40 Furlan CM, Salatino A, Domingos M

41 Garcia-Guzman G, Benitez-Malvido J  
42 Gianoli E, Hannunen S  
43 Glynn C, Herms DA, Egawa M, Hansen R, Mattson WJ  
44 Glynn C, Ronnberg-Wastljung A, Julkunen-Tiitto R, Weih M  
45 Goverde M, Erhardt A  
46 Goverde M, Bazin A, Shykoff JA, Erhardt A  
47 Goverde M, Erhardt A, Niklaus PA  
48 Gras EK, Read J, Mach CT, Sanson GD, Clissold FJ  
49 Hall MC, Stiling P, Moon DC, Drake BG, Hunter MD  
50 Hamilton JG, Zangerl AR, Berenbaum MR, Pippen J, Aldea M, DeLucia EH  
51 Harmon JP, Hladilek EE, Hinton JL, Stodola TJ, Andow DA  
52 Hartley SE, Gardner SM  
53 Hattenschwiler S, Schafellner C  
54 Hattenschwiler S, Schafellner C  
55 Hemming JDC, Lindroth RL  
56 Henn MW, Schopf R  
57 Henriksson J, Haukioja E, Ossipov V, Ossipova S, Sillanpaa S, Kapari L, Pihlaja K  
58 Holopainen JK, Rikala R, Kainulainen P, Oksanen J  
59 Holton MK, Lindroth RL, Nordheim EV  
60 Hui X, Chen J  
61 Hunter MD, Forkner RE  
62 Inbar M, Doostdar H, Mayer RT  
63 Izaguirre MM, Scopel AL, Baldwin IT, Ballare CL  
64 Jackson DM, Rufty TW, Heagle AS, Severson RF, Eckel RVW  
65 Johns CV, Beaumont LJ, Hughes L  
66 Johns CV, Hughes L  
67 Kerslake JE, Woodin SJ, Hartley SE  
68 King RT  
69 Kinney KK, Lindroth RL, Jung SM, Nordheim EV  
70 Kleiner KW, Raffa KF, Ellis DD, McCown BH  
71 Knepp RG, Hamilton JG, Mohan JE, Zangerl AR, Berenbaum MR, De Lucia EH  
72 Kopper BJ, Lindroth RL  
73 Kopper BJ, Lindroth RL  
74 Kopper BJ, Lindroth RL, Nordheim EV  
75 Kuokkanen K, Yan S, Niemela P  
76 Lara ACF, Fernandes GW, Goncalves-Alvim SJ  
77 Ledergerber S, Thommen GH, Baur B  
78 Levesque KR, Fortin M, Mauffette Y  
79 Lindroth RL, Kinney KK  
80 Lindroth RL, Kinney KK, Platz CL  
81 Lindroth RL, Roth S, Kruger EL, Volin JC, Koss PA  
82 Lower SS, Kirshenbaum S, Orians CM  
83 Manninen ANNE-M, Holopainen T, Lyytikainen-Saarenmaa P, Holopainen JK  
84 Mansfield JL, Curtis PS, Zak DR, Pregitzer KS  
85 Manzaneda AJ, Sperens U, Garcia MB  
86 Marquis RJ, Diniz IR, Morais HC

87 Mazza CA, Zavala J, Scopel AL, Ballare CL  
88 McAuslane HJ, Alborn HT  
89 McCloud ES, Berenbaum M  
90 McDonald EP, Agrell J, Lindroth RL  
91 McKinnon ML, Quiring DT, Bauce E  
92 Michelangeli FA  
93 Moon DC, Stiling P  
94 Muller CB, Mark DE, Fellowes H, Godfray CJ  
95 Mutikainen P, Walls M, Ovaska J, Keinanen M, Julkunen-Tiitto R, Vapaavuori E  
96 Newsham KK, Greenslade PD, McLeod AR  
97 Nichols-Orians CM  
98 Nichols-Orians CM  
99 Panzuto M, Lorenzetti F, Mauffette Y, Albert PJ  
100 Poorter L, van de Plassche M, Willems S, Boot RGA  
101 Reddy GVP, Tossavainen P, Nerg A-M, Holopainen JK  
102 Richardson SJ, Press MC, Parsons AN, Hartley SE  
103 Rieske LK  
104 Rieske LK, Housman HH, Arthur MA  
105 Rieske LK, Rhoades CC, Miller SP  
106 Rodho-Toly S, Majer JD, Yates C  
107 Rossi AM, Stiling P, Moon DC, Cattell MV, Drake BG  
108 Roth S, Lindroth RL, Volin JC, Kruger EL  
109 Roth S, McDonald EP, Lindroth RL  
110 Roth SK, Lindroth RL  
111 Rousseaux MC, Ballare CL, Scopel AL, Searles PS, Caldwell MM  
112 Rousseaux MC, Julkunen-Tiitto R, Searles PS, Scopel AL, Aphalo PJ, Ballare CL  
113 Rousseaux MC, Scopel AL, Searles PS, Caldwell MM, Sala OE, Ballare CL  
114 Rowe II WJ, Potter DA  
115 Roy BA, Gusewell S, Harte J  
116 Ruohomaki K, Chapin III FS, Haukioja E, Neuvonen S, Suomela A  
117 Sanders NJ, Belote RT, Weltzin JF  
118 Scheirs J, De Bruyn L  
119 Showler AT, Moran PJ  
120 Shure DJ, Mooreside PD, Ogle SM  
121 Shure DL, Wilson LA  
122 Sipura M, Tahvanainen J  
123 Smith PHD, Jone TH  
124 Srivastava AC, Tiwari LD, Pal M, Sengupta UK  
125 Stacey DA, Fellowes MDE  
126 Stamp NE, Osier TL  
127 Stiling P, Moon DC  
128 Stiling P, Moon DC, Hunter MD, Colson J, Rossi AM, Hymus GJ, Drake BG  
129 Stiling P, Rossi AM, Hungate B, Dijkstra P, Hinkle R, Knott III WM, Drake B  
130 Thomson VP, Nocotra AB, Steinbauer MJ  
131 van Dam NM, Hadwich K, Baldwin IT  
132 Van Damme JMM, Van Tienderen PH

133 Vasconcelos HL  
134 Vasconcelos HL, Cherrett JM  
135 Veteli TO, Kuokkanen K, Julkunen-Tiitto R, Roininen H, Tahvanainen J  
136 Veteli TO, Tegelberg R, Pusenius J, Sipura M, Julkunen-Tiitto R, Aphalo PJ, Tahvanainen J  
137 Wang M, Lincoln DE  
138 Warren JM, Bassman JH, Eigenbrode S  
139 Williams MA, Cronin JT  
140 Williams RS, Lincoln DE, Norby RJ  
141 Williams RS, Lincoln DE, Norby RL  
142 Williams RS, Lincoln DE, Thomas RB  
143 Williams RS, Thomas RB, Strain BR, Lincoln DE  
144 Woodrow IE, Slocum DJ, Gleadow RM  
145 Zavala JA, Scopel AL, Ballare CL

## TITLE

---

Effects of manipulation of plant carbon nutrient balance on tall goldenrod resistance to a gallmaking herbivore

CO<sub>2</sub> and O<sub>3</sub> effects on host plant preferences of the forest tent caterpillar (*Malacosoma disstria*)

Effects of CO<sub>2</sub> and light on tree phytochemistry and insect performance

Herbivore damage along a latitudinal gradient: relative impacts of different feeding guilds

Effect of plant density and light availability on leaf damage in *Manilkara bidentata* (Sapotaceae)

Growth and reproduction of the alpine grasshopper *Miramella alpina* feeding on CO<sub>2</sub>-enriched dwarf shrubs at treeline

The effects of slope orientation on plant growth, developmental instability and susceptibility to herbivores

Performance of a generalist grasshopper on a C<sub>3</sub> and a C<sub>4</sub> grass: compensation for the effects of elevated CO<sub>2</sub> on plant nutritional quality

Effects of elevated atmospheric CO<sub>2</sub> on the nutritional ecology of C<sub>3</sub> and C<sub>4</sub> grass-feeding caterpillars

Influence of atmospheric carbon dioxide enrichment on induced response and growth compensation after herbivore damage in *Lotus corniculatus*

Litter cover variability affects seedling performance and herbivory

The seedling community of tropical rainforest edges and its interaction with herbivores and pathogens

Responses of seedling transplants to environmental variations in contrasting habitats of Central Amazonia

Shading induced variability in azalea mediates its suitability as a host for the azalea lace bug

Herbivore attack in *Casuarina nitida* influenced by plant ontogenetic variation in foliage quality and plant architecture

Intraspecific variation in growth, defense, and herbivory in *Dialium guianense* (Caesalpiniaceae) mediated by edaphic heterogeneity

Effects of Nutrient Supply on Citrus Resistance to Root Herbivory by *Diaprepes abbreviatus* L. (Coleoptera: Curculionidae)

Effect of elevated CO<sub>2</sub> on the demography of a leaf-sucking mite feeding on bean

Relation of *Spodoptera eridania* choice to tannins and protein of *Lotus corniculatus*

Effects of mineral nutrition on delayed inducible resistance in Alaska paper birch

Effects of endophytic fungus, nutrient level, and plant damage on performance of fall armyworm (Lepidoptera: Noctuidae)

Effects of elevated temperature and carbon dioxide on the nutritional quality of leaves of oak (*Quercus robur* L.) as food for the winter moth (*Operophtera brumata* L.)

Leaf quality and herbivory responses to soil nutrient addition in secondary tropical dry forests of Yucatan, Mexico

Impact of Elevated CO<sub>2</sub> on Tri-Trophic Interaction of *Gossypium hirsutum*, *Aphis gossypii*, and *Leis axyridis*

Effects of elevated carbon dioxide levels and temperature on the life history of the Madeira mealy bug (Hemiptera: Pseudococcidae)

Interspecific competition affects growth and herbivore damage of *Brassica napus* in the field

Midseason Pest Status of the Cotton Aphid (Homoptera: Aphididae) in California Cotton: Is Nitrogen a Key Factor?

Elevated CO<sub>2</sub> decreases leaf fluctuating asymmetry and herbivory by leaf miners on two oak species

Plant allocation to defensive compounds: interactions between elevated CO<sub>2</sub> and nitrogen in transgenic cotton plants

The dynamics of carbon-nutrient balance: Effects of cottonwood acclimation to short and long-term shade on beetle feeding preferences

Fertility affects susceptibility of chrysanthemum to cotton aphids: Influence on plant growth, photosynthesis, ethylene evolution, and herbivore abundance

Nutrient stress, host plant quality and herbivore performance of a leaf-mining fly on grass

The influence of light and nutrients on foliar phenolics and insect herbivory

Effect of soil-applied complex fertiliser on an insect–host plant relationship: *Liriomyza trifolii* on *Solanum tuberosum*

Why are leaf-cutting ants more common in early secondary forests than in old-growth tropical forests? An evaluation of the palatable forage hypothesis

What goes up must come down? Nutrient addition and predation pressure on oak herbivores

Feeny revisited: condensed tannins as anti-herbivore defences in leaf-chewing herbivore communities of *Quercus*

Forest edge effects on the biological performance of the forest tent caterpillar (Lepidoptera: Lasiocampidae) in sugar maple stands

Interacting effects of herbivory and fertility on a synthesized plant community

Influence of air pollution on leaf chemistry, herbivore feeding and gall frequency on *Tibouchina pulchra* leaves in Curitiba, Brazil

Effect of litter on the incidence of leaf-fungal pathogens and herbivory in seedlings of the tropical tree *Nectandra ambigens*  
Plasticity of leaf traits and insect herbivory in *Solanum incarum* L. (Solanaceae) in Nguruman, SW Kenya  
Effects of nutrient availability on biomass allocation as well as constitutive and rapid induced herbivore resistance in poplar  
Willow genotype, but not drought treatment, affects foliar phenolic concentrations and leaf-beetle resistance  
Effects of elevated CO<sub>2</sub> on development and larval food-plant preference in the butterfly *coenonympha pamphilus* (Lepidoptera, Satyridae)  
Influence of leaf chemistry of *Lotus corniculatus* (Fabaceae) on larval development of *Polyommatus icarus* (Lepidoptera, Lycaenidae): effects of elevated CO<sub>2</sub> and plant genotype  
In situ development of a satyrid butterfly on calcareous grassland exposed to elevated carbon dioxide  
Herbivore damage, resource richness, and putative defences in juvenile versus adult *Eucalyptus* leaves  
Effects of elevated CO<sub>2</sub> on foliar quality and herbivore damage in a scrub oak ecosystem  
Insect herbivory in an intact forest understory under experimental CO<sub>2</sub> enrichment  
Herbivory response to vegetational diversity: spatial interaction of resources and natural enemies  
The response of *Philaenus spumarius* (Homoptera: Cercopidae) to fertilizing and shading its moorland host-plant (*Calluna vulgaris*)  
Gypsy moth feeding in the canopy of a CO<sub>2</sub>-enriched mature forest  
Opposing effects of elevated CO<sub>2</sub> and N deposition on *Lymantria monacha* larvae feeding on spruce trees  
Effects of light and nutrient availability on aspen: Growth, phytochemistry, and insect performance  
Response of beech (*Fagus sylvatica*) to elevated CO<sub>2</sub> and N: Influence on larval performance of the gypsy moth *Lymantria dispar* (Lep., Lymantriidae)  
Effects of host shading on consumption and growth of the geometrid *Epirrita autumnata*: interactive roles of water, primary and secondary compounds  
Resource Partitioning to Growth, Storage and Defence in Nitrogen-Fertilized Scots Pine and Susceptibility of the Seedlings to the Tarnished Plant Bug *Lygus rugulipennins*  
Foliar quality influences tree-herbivore-parasitoid interactions: effects of elevated CO<sub>2</sub>, O<sub>3</sub>, and plant genotype  
Interspecific variation of plant traits associated with resistance to herbivory among four species of *Ficus* (Moraceae)  
HURRICANE DAMAGE INFLUENCES FOLIAR POLYPHENOLICS AND SUBSEQUENT HERBIVORY ON SURVIVING TREES  
Suitability of stressed and vigorous plants to various insect herbivores  
Convergent Responses to Stress. Solar Ultraviolet-B Radiation and *Manduca sexta* Herbivory Elicit Overlapping Transcriptional Responses in Field-Grown Plants of *Nicotiana longiflora*  
Survival and development of tobacco hornworm larvae on tobacco plants grown under elevated levels of ozone  
Effects of elevated CO<sub>2</sub> and temperature on development and consumption rates of *Octotoma championi* and *O. Scabripennis* feeding on *Lantana camara*  
Interactive effects of CO<sub>2</sub> and temperature on the leaf-miner *Dialectica scariella* Zeller (Lepidoptera: Gracillariidae) in Paterson's Curse, *Echium plantagineum* (Boraginaceae)  
Effects of Carbon Dioxide and Nitrogen Enrichment on a Plant-Insect Interaction: The Quality of *Calluna vulgaris* as a Host for *Operophtera brumata*  
Succession and Micro-elevation Effects on Seedling Establishment of *Calophyllum brasiliense* Camb. (Clusiaceae) in an Amazonian River Meander Forest  
Effects of CO<sub>2</sub> and NO<sub>3</sub>-availability on deciduous trees: phytochemistry and insect performance  
Effect of nitrogen availability on the growth and phytochemistry of hybrid poplar and the efficacy of the *Bacillus thuringiensis* cry1A(a) d-endotoxin on gypsy moth  
Elevated CO<sub>2</sub> reduces leaf damage by insect herbivores in a forest community  
Effects of elevated carbon dioxide and ozone on the phytochemistry of aspen and performance of an herbivore  
Responses of trembling aspen (*Populus tremuloides*) phytochemistry and aspen blotch leafminer (*Phyllonorycter tremuloidiella*) performance to elevated levels of atmospheric CO<sub>2</sub> and O<sub>3</sub>  
Effects of elevated carbon dioxide and ozone on the phytochemistry of aspen and performance of an herbivore  
Effects of elevated CO<sub>2</sub> and temperature on the leaf chemistry of birch *Betula pendula* (Roth) and the feeding behaviour of the weevil *Phyllobius maculicornis*  
Tests of hypotheses on patterns of gall distribution along an altitudinal gradient  
Grazing damage to plants and gastropod and grasshopper densities in a CO<sub>2</sub>-enrichment experiment on calcareous grassland  
Temperature and food quality effects on growth, consumption, and post-utilization efficiencies of the forest tent caterpillar *Malacosoma disstria* (Lepidoptera: Lasiocampidae)  
Consequences of enriched atmospheric CO<sub>2</sub> and defoliation for foliar chemistry and gypsy moth performance  
Responses of deciduous trees to elevated atmospheric CO<sub>2</sub>: productivity, phytochemistry, and insect performance  
CO<sub>2</sub>-Mediated changes in Aspen chemistry: effects on gypsy moth performance and susceptibility to virus  
Preference and performance of a willow-feeding leaf beetle: soil nutrient and flooding effects on host quality  
The role of low-level ozone exposure and mycorrhizas in chemical quality and insect herbivore performance on Scots pine seedlings  
Genotypic Variation for Condensed Tannin Production in Trembling Aspen (*Populus tremuloides*, Salicaceae) Under Elevated CO<sub>2</sub> and in High- and Low-Fertility Soil  
Effects of microsite disturbances and herbivory on seedling performance in the perennial herb *Helleborus foetidus* (Ranunculaceae)  
Patterns and correlates of interspecific variation in foliar insect herbivory and pathogen attack in Brazilian cerrado

Perception of solar UVB radiation by phytophagous insects: Behavioral responses and ecosystem consequences  
Influence of previous herbivory on behavior and development of *Spodoptera exigua* larvae on glanded and glandless cotton  
Effects of enhanced UV-B radiation on a weedy forb (*Plantago lanceolata*) and its interactions with a generalist and specialist herbivore  
CO<sub>2</sub> and light effects on deciduous trees: growth, foliar chemistry, and insect performance  
Influence of tree growth rate, shoot size and foliar chemistry on the abundance and performance of a galling adelgid  
Ant protection against herbivory in three species of *Tococa* (Melastomataceae) occupying different environments  
The influence of a salinity and nutrient gradient on coastal vs. upland tritrophic complexes  
Relative importance of fertiliser addition to plants and exclusion of predators for aphid growth in the field  
Herbivore resistance in *Betula pendula*: Effect of fertilization, defoliation, and plant genotype  
Effects of elevated ultraviolet radiation on *Quercus robur* and its insect and ectomycorrhizal associates  
Environmentally induced differences in plant traits: consequences for susceptibility to a leaf-cutter ant  
The effects of light on foliar chemistry, growth and susceptibility of seedlings of a canopy tree to an attine ant  
Perception of aspen and sun/shade sugar maple leaf soluble extracts by larvae of *Malacosoma disstria*  
Leaf traits and herbivory rates of tropical trees species differing in successional status  
Elevated Atmospheric CO<sub>2</sub> Affects the Chemical Quality of Brassica Plants and the Growth Rate of the Specialist, *Plutella xylostella*, but Not the Generalist, *Spodoptera littoralis*  
How do nutrients and warming impact on plant communities and their insect herbivores? A 9-year study from a sub-Arctic heath  
Wildfire alters oak growth, foliar chemistry, and herbivory  
Effects of prescribed fire on canopy foliar chemistry and suitability for an insect herbivore  
Foliar Chemistry and Gypsy Moth, *Lymantria dispar* (L.), Herbivory on Pure American Chestnut, *Castanea dentata* (Fam: Fagaceae), and a disease-resistant hybrid  
Impact of fire on leaf nutrients, arthropod fauna and herbivory of native and exotic eucalypts in Kings Park, Perth, Western Australia  
Induced defensive response of myrtle oak to foliar insect herbivory in ambient and elevated CO<sub>2</sub>  
Enriched atmospheric CO<sub>2</sub> and defoliation: effects on tree chemistry and insect performance  
Atmospheric CO<sub>2</sub> and soil water availability: consequences for tree-insect interactions  
Effects of CO<sub>2</sub>-mediated changes in paper birch and white pine chemistry on gypsy moth performance  
Solar ultraviolet-B radiation affects plant-insect interactions in a natural ecosystem of Tierra del Fuego (southern Argentina)  
Solar UV-B radiation affects leaf quality and insect herbivory in the southern beech tree *Nothofagus antarctica*  
Responses to solar ultraviolet-B radiation in a shrubdominated natural ecosystem of Tierra del Fuego (southern Argentina)  
Shading Effects on Susceptibility of *Rosa* spp. to Defoliation by *Popillia japonica* (Coleoptera: Scarabaeidae)  
Response of plant pathogens and herbivores to a warming experiment  
Delayed inducible resistance in mountain birch in response to fertilization and shade  
Multitrophic Effects of Elevated Atmospheric CO<sub>2</sub> on Understory Plant and Arthropod Communities  
Plant-mediated effects of drought stress on host preference and performance of a grass miner  
Effects of drought stressed cotton, *Gossypium hirsutum* L., on beet armyworm, *Spodoptera exigua* (Hubner), oviposition, and larval feeding preferences and growth  
Rainfall effects on plant-herbivore processes in an upland oak forest  
Patch-size effects on plant phenolics in successional openings of the Southern Appalachians  
Shading enhances the quality of willow leaves to leaf beetles – but does it matter?  
Effects of elevated CO<sub>2</sub> on the chrysanthemum leaf-miner, *Chromatomyia syngenesiae*: a greenhouse study  
CO<sub>2</sub>-mediated changes in mungbean chemistry: Impact on plant-herbivore interactions  
Influence of elevated CO<sub>2</sub> on interspecific interactions at higher trophic levels  
Combined effect of night-time temperature and allelochemicals on performance of a Solanaceae specialist herbivore  
Quality or quantity: the direct and indirect effects of host plants on herbivores and their natural enemies  
Elevated CO<sub>2</sub> lowers relative and absolute herbivore density across all species of a scrub-oak forest  
Decreased leaf miner abundance in elevated CO<sub>2</sub>: reduced leaf quality and increased parasitoid attack  
Influence of previous frost damage on tree growth and insect herbivory of *Eucalyptus globulus globulus*  
Induced responses in *Nicotiana attenuata* affect behavior and growth of the specialist herbivore *Manduca sexta*  
The relationship between relative growth rate and susceptibility to aphids in wild barley under different nutrient levels

Foraging activity of an Amazonian leaf-cutting ant: responses to changes in the availability of woody plants and to previous plant damage

The effect of wilting on the selection of leaves by the leaf-cutting *Atta laevigata*

Effects of elevated CO<sub>2</sub> and temperature on plant growth and herbivore defensive chemistry

Interactions between willows and insect herbivores under enhanced ultraviolet-B radiation

Effects of light intensity and artificial wounding on monoterpene production in *Myrica cerifera* from two different ecological habitats

Leaf chemical changes induced in *Populus trichocarpa* by enhanced UV-B radiation and concomitant effects on herbivory by *Chrysomela scripta* (Coleoptera: Chrysomelidae)

Response of a Gall-Forming Guild (Hymenoptera: Cynipidae) to Stressed and Vigorous Prairie Roses

Leaf age effects of elevated CO<sub>2</sub>-grown white oak leaves on spring-feeding Lepidopterans

Development of gypsy moth larvae feeding on red maple saplings at elevated CO<sub>2</sub> and temperature

Effects of elevated CO<sub>2</sub>-grown loblolly pine needles on the growth, consumption, development, and pupal weight of red-headed pine sawfly larvae reared with open-topped chambers

Effects of elevated CO<sub>2</sub>, soil nutrient levels, and foliage age on the performance of two generations of *Neodiprion lecontei* (Hymenoptera: Diprionidae) feeding on loblolly pine

Influence of water stress on cyanogenic capacity in *Eucalyptus cladocalyx*

Effects of ambient UV-B radiation on soybean crops: Impact on leaf herbivory by *Anticarsia gemmatilis*



| CIT. SOURCE                                                  | VOL | PP        | DATE | DEFENSE                 | ENVIRONMENTAL VARIABLE |
|--------------------------------------------------------------|-----|-----------|------|-------------------------|------------------------|
| 1 Oecologia                                                  | 77  | 302-306   | 1988 |                         | N                      |
| 2 Global Change Biology                                      | 11  | 588-599   | 2005 | phenolics               | CO2, O3                |
| 3 Oikos                                                      | 88  | 259-272   | 2000 | phenolics               | CO2, N                 |
| 4 Oikos                                                      | 108 | 176-182   | 2005 | leaf toughness          | maturity, temp         |
| 5 Journal of Tropical Ecology                                | 16  | 447-464   | 2000 | phenolics               | N                      |
| 6 Oecologia                                                  | 142 | 191-201   | 2005 |                         | CO2                    |
| 7 Journal of Arid Environments                               | 55  | 405-416   | 2003 | symmetry                | light                  |
| 8 Oecologia                                                  | 140 | 96-103    | 2004 | leaf toughness          | CO2                    |
| 9 Oecologia                                                  | 140 | 86-95     | 2004 |                         | water                  |
| 10 Ecological Entomology                                     | 27  | 271-278   | 2002 | phenolics               | CO2                    |
| 11 Biotropica                                                | 31  | 598-606   | 1999 |                         | litter                 |
| 12 Biotropica                                                | 37  | 301-313   | 2005 |                         | disturbance            |
| 13 Journal of Tropical Ecology                               | 21  | 397-406   | 2005 |                         | disturbance            |
| 14 Journal of the American Society for Horticultural Science | 128 | 497-503   | 2003 | trichomes               | light                  |
| 15 Oecologia                                                 | 143 | 117-125   | 2005 | phenolics               | maturity               |
| 16 Plant Ecology                                             | 175 | 59-69     | 2004 | phenolics               | soil                   |
| 17 Environmental Entomology                                  | 32  | 1242-1250 | 2003 | peroxidase, chitinase   | N                      |
| 18 Oecologia                                                 | 123 | 75-81     | 2000 | tannins                 | CO2                    |
| 19 Journal of Chemical Ecology                               | 16  | 1557-1564 | 1990 | phenolics               | N                      |
| 20 Ecology                                                   | 74  | 2072-2084 | 1993 | tannins                 | N                      |
| 21 Environmental Entomology                                  | 27  | 631-635   | 1998 |                         | N                      |
| 22 Functional Ecology                                        | 12  | 742-749   | 1998 | tannins, leaf toughness | CO2, temp              |
| 23 Journal of Tropical Ecology                               | 19  | 525-530   | 2003 |                         | N                      |
| 24 Environmental Entomology                                  | 34  | 37-46     | 2005 |                         | CO2                    |
| 25 Journal of entomological science                          | 39  | 387-397   | 2004 |                         |                        |
| 26 Plant Ecology                                             | 162 | 227-231   | 2002 |                         | disturbance            |
| 27 Population Ecology                                        | 30  | 501-510   | 2001 |                         | N                      |
| 28 Global Change Biology                                     | 10  | 27-36     | 2003 | tannins                 | CO2                    |
| 29 Journal of Experimental Botany                            | 53  | 323-331   | 2002 | terpenes                | CO2, N                 |
| 30 Journal of Chemical Ecology                               | 25  | 635-656   | 1999 | phenolics               | light                  |
| 31 Journal of the American Society for Horticultural Science | 129 | 344-353   | 2004 |                         | N                      |
| 32 Oecologia                                                 | 130 | 594-599   | 2002 |                         | N                      |
| 33 Ecology                                                   | 75  | 86-98     | 1994 | phenolics               | disturbance            |
| 34 Entomologia Experimentalis et Applicata                   | 115 | 67-77     | 2005 | leaf toughness          | light                  |
| 35 Oikos                                                     | 92  | 169-177   | 2001 |                         | growth form            |
| 36 Ecology                                                   | 81  | 1588-1600 | 2000 | tannins                 | N                      |
| 37 Ecological Entomology                                     | 29  | 174-187   | 2004 | tannins                 | light                  |
| 38 Ecoscience                                                | 8   | 164-172   | 2001 | phenolics               | disturbance            |
| 39 Journal of Ecology                                        | 87  | 514-525   | 1999 |                         | N                      |
| 40 Biochemical Systematics and Ecology                       | 32  | 53-63     | 2004 | phenolics, lignin       | disturbance            |

|    |                                         |     |           |      |                           |             |
|----|-----------------------------------------|-----|-----------|------|---------------------------|-------------|
| 41 | Journal of Tropical Ecology             | 19  | 171-177   | 2003 | thick leaves              | CO2         |
| 42 | African Journal of Ecology              | 38  | 183-187   | 2000 | leaf toughness            | water       |
| 43 | Oikos                                   | 101 | 385-397   | 2003 | phenolics                 | N           |
| 44 | Entomologia Experimentalis et Applicata | 113 | 1-14      | 2004 | tannis                    | water       |
| 45 | Global Change Biology                   | 9   | 74-83     | 2003 |                           |             |
| 46 | Functional Ecology                      | 13  | 801-810   | 1999 | cyanate                   | CO2         |
| 47 | Ecology                                 | 83  | 1399-1411 | 2002 | phenolics                 | CO2         |
| 48 | Australian Journal of Botany            | 53  | 33-44     | 2005 | terpenes, leaf toughness  | maturity    |
| 49 | Journal of Chemical Ecology             | 31  | 267-286   | 2005 | phenolics                 | CO2         |
| 50 | Oecologia                               | 138 | 566-573   | 2004 |                           | CO2         |
| 51 | Population Ecology                      | 45  | 75-81     | 2003 | monoculture               | density     |
| 52 | Ecological Entomology                   | 20  | 396-399   | 1995 | phenolics                 | N           |
| 53 | Global Change Biology                   | 10  | 1899-1908 | 2004 | phenolics                 | CO2         |
| 54 | Oecologia                               | 118 | 210-217   | 1999 | tannins                   | CO2         |
| 55 | Journal of Chemical Ecology             | 25  | 1687-1714 | 1999 | phenolics                 | N, light    |
| 56 | Journal of Applied Entomology           | 125 | 501-505   | 2001 |                           | CO2, N      |
| 57 | Oikos                                   | 103 | 3-16      | 2003 | phenolics                 | light       |
| 58 | New Phytologist                         | 131 | 521-532   | 1995 | terpenes                  | N           |
| 59 | Oecologia                               | 137 | 233-244   | 2003 | tannins                   | CO2, O3     |
| 60 | Annals of Botany                        | 94  | 377-384   | 2004 | leaf toughness            | growth form |
| 61 | Ecology                                 | 80  | 2676-2682 | 1999 | tannins                   | disturbance |
| 62 | Oikos                                   | 94  | 228-235   | 2001 | phenolics, peroxidase     | water, N    |
| 63 | Plant Physiology                        | 132 | 1755-1767 | 2003 | phenolics                 | CO2         |
| 64 | Journal of Chemical Ecology             | 26  | 1-19      | 2000 | alkaloids, terpenes       | O3          |
| 65 | Entomologia Experimentalis et Applicata | 108 | 169-178   | 2003 | thicker leaves            | temp, CO2   |
| 66 | Global Change Biology                   | 8   | 142-152   | 2002 |                           | temp, CO2   |
| 67 | New Phytologist                         | 140 | 43-53     | 1998 | phenolics                 | UV          |
| 68 | Biotropica                              | 35  | 462-471   | 2003 |                           | disturbance |
| 69 | Ecology                                 | 78  | 215-230   | 1997 | phenolics                 | CO2, light  |
| 70 | Canadian Journal of Forest Research     | 28  | 1055-1067 | 1998 |                           | litter      |
| 71 | New Phytologist                         | 167 | 207-218   | 2005 | leaf toughness            | CO2         |
| 72 | Oecologia                               | 134 | 95-103    | 2003 | tough leaves              | CO2         |
| 73 | Agricultural and Forest Entomology      | 5   | 17-26     | 2003 |                           | CO2         |
| 74 | Population Ecology                      | 30  | 1119-1126 | 2001 |                           | CO2, temp   |
| 75 | Agricultural and Forest Entomology      | 5   | 209-217   | 2003 | phenolics, thicker leaves | CO2         |
| 76 | Tropical Zoology                        | 15  | 219-232   | 2002 |                           | water       |
| 77 | Acta Oecologica                         | 18  | 255-261   | 1997 |                           | CO2         |
| 78 | Bulletin of Entomological Research      | 92  | 127-136   | 2002 |                           | disturbance |
| 79 | Journal of Chemical Ecology             | 24  | 1677-1695 | 1998 | amide                     | temp        |
| 80 | Ecology                                 | 74  | 763-777   | 1993 | phenolics, leaf toughness | CO2         |
| 81 | Global Change Biology                   | 3   | 279-289   | 1997 | tannins                   | CO2, O3     |
| 82 | Oecologia                               | 136 | 402-411   | 2003 | phenolics                 | N           |
| 83 | Global Change Biology                   | 6   | 111-121   | 2000 |                           | O3          |
| 84 | American Journal of Botany              | 86  | 1154-1159 | 1999 | tannins                   | CO2         |
| 85 | Plant Ecology                           | 179 | 73-82     | 2005 |                           | disturbance |
| 86 | Journal of Tropical Ecology             | 17  | 127-148   | 2001 | leaf toughness, phenolics | water       |

|     |                                                            |     |           |      |                      |             |
|-----|------------------------------------------------------------|-----|-----------|------|----------------------|-------------|
| 87  | Proceedings of the National Academy of Sciences of the USA | 96  | 980-985   | 1999 |                      | UV          |
| 88  | Entomologia experimentalis et applicata                    | 97  | 283-291   | 2000 | terpenes             | maturity    |
| 89  | Entomologia Experimentalis et Applicata                    | 93  | 233-247   | 1999 |                      | UV          |
| 90  | Oecologia                                                  | 119 | 389-399   | 1999 | tannins              | light, CO2  |
| 91  | Functional Ecology                                         | 13  | 859-867   | 1999 |                      | N           |
| 92  | Biotropica                                                 | 35  | 181-188   | 2003 | ants                 | disturbance |
| 93  | Ecology                                                    | 85  | 2709-2716 | 2004 |                      | N           |
| 94  | Oecologia                                                  | 143 | 419-427   | 2005 |                      |             |
| 95  | Ecology                                                    | 81  | 49-65     | 2000 | tannins              | N           |
| 96  | Global Change Biology                                      | 5   | 881-890   | 1999 | thicker leaves       | UV          |
| 97  | Ecology                                                    | 72  | 1609-1623 | 1991 | phenolics            | N           |
| 98  | Oecologia                                                  | 86  | 552-560   | 1991 | tannins              | light       |
| 99  | Journal of Chemical Ecology                                | 27  | 1963-1978 | 2001 | less sugar           | light       |
| 100 | Plant Biology                                              | 6   | 746-754   | 2004 | lignin               | growth form |
| 101 | Journal of Agricultural and Food Chemistry                 | 52  | 4185-4191 | 2004 | phenolics            | CO2         |
| 102 | Journal of Ecology                                         | 90  | 544-556   | 2002 | phenolics            | N           |
| 103 | Forest Ecology and Management                              | 168 | 91-99     | 2002 | tannins              | disturbance |
| 104 | Forest Ecology and Management                              | 160 | 177-187   | 2002 | tannins              | disturbance |
| 105 | Environmental Entomology                                   | 32  | 359-365   | 2003 | tannins              | N           |
| 106 | Austral Ecology                                            | 26  | 500-506   | 2001 |                      | disturbance |
| 107 | Journal of Chemical Ecology                                | 30  | 1143-1152 | 2004 | tannins              | CO2         |
| 108 | Global Change Biology                                      | 4   | 419-430   | 1998 | tannins              | CO2         |
| 109 | Canadian Journal of Forest Research                        | 27  | 1281-1290 | 1997 | phenolics            | water, CO2  |
| 110 | Oecologia                                                  | 98  | 133-138   | 1994 | phenolics            | CO2, N      |
| 111 | Oecologia                                                  | 116 | 528-535   | 1998 |                      | UV          |
| 112 | Oecologia                                                  | 138 | 505-512   | 2004 | leaf thickness       | light, UV   |
| 113 | Global Change Biology                                      | 7   | 467-478   | 2001 |                      | UV          |
| 114 | Environmental Entomology                                   | 29  | 502-508   | 2000 |                      | light       |
| 115 | Ecology                                                    | 85  | 2570-2581 | 2004 |                      | temp        |
| 116 | Ecology                                                    | 77  | 2302-2311 | 1996 |                      | CO2         |
| 117 | Environmental Entomology                                   | 33  | 1609-1616 | 2004 |                      | CO2         |
| 118 | Oikos                                                      | 108 | 371-85    | 2005 | stress               | water       |
| 119 | Journal of Chemical Ecology                                | 29  | 1997-2011 | 2003 | tannins, terpenes    | CO2         |
| 120 | Ecology                                                    | 79  | 604-617   | 1998 | tannins              | water       |
| 121 | Ecology                                                    | 74  | 55-67     | 1993 | phenolics            | disturbance |
| 122 | Oikos                                                      | 91  | 550-558   | 2000 |                      | light       |
| 123 | Global Change Biology                                      | 4   | 287-291   | 1998 | thicker leaves       | CO2         |
| 124 | Current Science                                            | 82  | 1148-1151 | 2002 | tannins              | CO2         |
| 125 | Global Change Biology                                      | 8   | 668-678   | 2002 |                      | CO2         |
| 126 | Ecoscience                                                 | 4   | 286-295   | 1997 |                      | CO2         |
| 127 | Oecologia                                                  | 142 | 413-420   | 2005 |                      | N           |
| 128 | Oecologia                                                  | 134 | 82-87     | 2003 |                      | CO2         |
| 129 | Ecological Applications                                    | 9   | 240-244   | 1999 | proteinase inhibitor | UV          |
| 130 | Austral Ecology                                            | 26  | 489-499   | 2001 | stress               | frost       |
| 131 | Oecologia                                                  | 122 | 371-379   | 2000 | alkaloids            | N           |
| 132 | Oecologia                                                  | 137 | 564-571   | 2003 |                      | N           |

|     |                                         |     |           |      |                           |                      |
|-----|-----------------------------------------|-----|-----------|------|---------------------------|----------------------|
| 133 | Oecologia                               | 112 | 370-378   | 1997 | leaf toughness            | previous defoliation |
| 134 | Entomologia Experimentalis et Applicata | 78  | 215-220   | 1996 | latex, volatiles          | water                |
| 135 | Global Change Biology                   | 8   | 1240-1252 | 2002 | phenolics                 | temp, CO2            |
| 136 | Oecologia                               | 137 | 312-320   | 2003 | phenolics, leaf toughness | UV                   |
| 137 | Canadian Journal of Botany              | 82  | 1501-1508 | 2004 | monoterpene               | light                |
| 138 | Tree Physiology                         | 22  | 1137-1146 | 2002 |                           | UV                   |
| 139 | Environmental Entomology                | 33  | 1052-1061 | 2004 |                           | N                    |
| 140 | Global Change Biology                   | 4   | 235-246   | 1998 | TNC                       | CO2                  |
| 141 | Oecologia                               | 137 | 114-122   | 2003 | phenolics                 | light                |
| 142 | Global Change Biology                   | 3   | 501-511   | 1997 |                           | CO2                  |
| 143 | Environmental Entomology                | 26  | 1312-1322 | 1997 | terpene                   | CO2, N               |
| 144 | Functional Plant Biology                | 29  | 103-110   | 2002 | cyanogenic                | water                |
| 145 | Plant Ecology                           | 156 | 121-130   | 2001 |                           | N                    |
